# Supplementary material for: Systematic discovery of drug action mechanisms by an integrated chemical genomics approach: identification of functional disparities between azacytidine and decitabine
Source: PubMed Central journal article supplement (PMC5053656; doi:10.18632/oncotarget.8455), 2016-03-29
Supplement: oncotarget-07-27363-s001.pdf [file oncotarget-07-27363-s001.pdf]

## **Systematic discovery of drug action mechanisms by an integrated chemical genomics approach: identification of functional disparities between azacytidine and decitabine**

### **Supplementary Materials**

**Supplementary Table S1: The top 100 compounds similar to azacytidine (AZA) and decitabine (DAC)**

**Supplementary Table S2: The top 100 genes with gene expression profiles similar to AZA and DAC when they are knocked down or overexpressed**
